# Supplementary material for: Complement C7 (C7), a Potential Tumor Suppressor, Is an Immune-Related Prognostic Biomarker in Prostate Cancer (PC)
Source: Front Oncol. 2020 Aug 25;10:1532. doi: 10.3389/fonc.2020.01532 (PMC7477933; doi:10.3389/fonc.2020.01532)
Supplement: Table S3 — Differentially expressed genes (DEGs) between low-stromal samples and high-stromal samples. [file Table_3.XLSX]

## Sheet: diffSig2
Table S3: Differentially expressed genes (DEGs) between low-stromal samples and high-stromal samples.
DEGs	logFC	AveExpr	t	P.Value	adj.P.Val	B
PDGFRB	1.30368	11.8034	26.3287	3.86259e-96	9.39266e-92	208.528
ECM2	1.18832	9.10289	24.0144	4.89972e-85	5.95733e-81	183.127
DPYSL2	1.07108	10.6791	23.789	5.98977e-84	4.85511e-80	180.639
FAM26E	1.00355	7.74473	23.7273	1.18841e-83	7.22462e-80	179.958
A2M	1.39813	14.675	23.322	1.07756e-81	4.36718e-78	175.479
SYT11	1.24636	9.79028	22.9963	4.0414e-80	1.22955e-76	171.877
COL1A2	1.47273	14.4892	22.9963	4.04506e-80	1.22955e-76	171.876
SPARC	1.34554	14.3105	22.8853	1.39187e-79	3.76067e-76	170.648
MMP2	1.42399	12.1034	22.8089	3.2572e-79	7.92053e-76	169.803
TGFBI	1.15501	11.2781	22.7992	3.62955e-79	7.92489e-76	169.695
GLT8D2	1.0197	8.64819	22.7925	3.91079e-79	7.92489e-76	169.621
RFTN1	1.12325	9.74246	22.6337	2.29237e-78	4.28797e-75	167.863
FBLN5	1.30454	11.071	22.4493	1.78802e-77	3.10566e-74	165.822
TMEM119	1.30289	9.77755	22.1712	3.95903e-76	6.01699e-73	162.743
COL15A1	1.30438	11.6832	22.0855	1.02868e-75	1.47144e-72	161.794
TIMP2	1.14719	13.2992	21.9411	5.1377e-75	6.94075e-72	160.195
RAB31	1.09612	10.5038	21.6219	1.79943e-73	2.30299e-70	156.66
FBN1	1.38321	11.0831	21.4215	1.6767e-72	1.85329e-69	154.442
C1S	1.42116	12.9074	21.4019	2.08492e-72	2.20431e-69	154.225
CCDC80	1.56566	11.2825	21.3304	4.62074e-72	4.68177e-69	153.434
PDGFRA	1.42783	9.58726	21.3131	5.60032e-72	5.31855e-69	153.243
COL5A1	1.29757	11.6307	21.3118	5.68665e-72	5.31855e-69	153.228
CTSK	1.14801	10.1774	21.123	4.64631e-71	4.03515e-68	151.14
COL14A1	1.55006	11.0713	21.0546	9.94568e-71	8.06164e-68	150.383
LAMA4	1.18674	10.7589	21.0409	1.15914e-70	8.80835e-68	150.231
ZEB2	1.25368	9.97104	21.0104	1.62638e-70	1.19845e-67	149.894
IGFBP7	1.12966	13.7974	20.9103	4.95262e-70	3.54215e-67	148.788
CDH11	1.38541	10.5553	20.896	5.81069e-70	4.0371e-67	148.629
EDIL3	1.29704	9.08411	20.8559	9.07205e-70	6.12792e-67	148.186
SYNPO	1.17093	11.8365	20.5991	1.5762e-68	9.82779e-66	145.348
MIR3606	1.49168	14.0797	20.5231	3.66542e-68	2.2283e-65	144.509
PMP22	1.15303	10.437	20.4607	7.3291e-68	4.34687e-65	143.82
MOXD1	1.47054	10.5381	20.4381	9.42464e-68	5.45664e-65	143.57
LUM	1.58396	12.5022	20.4025	1.39911e-67	7.91214e-65	143.177
ELN	1.38761	11.8873	20.1243	3.06561e-66	1.58609e-63	140.109
EGFLAM	1.03594	8.69034	20.0716	5.49786e-66	2.78524e-63	139.528
PEAK1	1.1829	9.94394	20.0508	6.9246e-66	3.43644e-63	139.299
COL4A2	1.20576	13.6595	20.0353	8.22361e-66	3.99947e-63	139.128
LAMA2	1.35038	9.72827	19.9783	1.54707e-65	7.37648e-63	138.5
COL8A1	1.53062	10.7244	19.9636	1.82117e-65	8.51641e-63	138.338
ENPEP	1.09587	7.93129	19.935	2.4984e-65	1.1463e-62	138.023
HEYL	1.16014	10.0625	19.8448	6.78888e-65	3.00155e-62	137.03
OLFML1	1.1641	8.70167	19.8367	7.42837e-65	3.2196e-62	136.94
PODN	1.35472	10.7866	19.7814	1.37026e-64	5.74494e-62	136.331
CTSC	1.01634	10.3538	19.7478	1.98551e-64	8.04693e-62	135.963
FRZB	1.24864	9.63213	19.7453	2.04335e-64	8.14561e-62	135.934
AXL	1.08144	10.6424	19.7186	2.74519e-64	1.07669e-61	135.641
PECAM1	1.04131	11.688	19.6197	8.19424e-64	3.16285e-61	134.554
WIPF1	1.03268	10.3266	19.4701	4.28444e-63	1.57856e-60	132.909
GAS7	1.08506	9.39399	19.3833	1.11789e-62	3.99759e-60	131.956
PLEKHG1	1.0427	8.51179	19.3489	1.63345e-62	5.75661e-60	131.579
KIRREL	1.15922	9.97648	19.3195	2.25969e-62	7.84983e-60	131.256
ADAMTS2	1.3151	9.26615	19.2851	3.30301e-62	1.13126e-59	130.879
GGT5	1.07717	10.5897	19.2703	3.88941e-62	1.3136e-59	130.717
ZEB1	1.08791	10.1918	19.2233	6.53232e-62	2.17598e-59	130.201
SULF1	1.46034	11.7541	19.1563	1.36792e-61	4.4951e-59	129.467
COL4A1	1.26622	12.9123	19.1482	1.49641e-61	4.85176e-59	129.377
MFGE8	1.09387	12.0589	19.138	1.67417e-61	5.35667e-59	129.266
EPB41L2	1.07499	10.2885	19.1237	1.95976e-61	6.14287e-59	129.109
MFAP4	1.39889	12.1301	19.1232	1.97041e-61	6.14287e-59	129.104
MIR4649	1.34498	13.5163	19.1157	2.1393e-61	6.58497e-59	129.022
KIAA1755	1.01519	8.33905	19.1051	2.4064e-61	7.22424e-59	128.905
VIM	1.00936	13.7576	19.0972	2.62508e-61	7.78465e-59	128.819
COL6A3	1.38014	12.8554	19.0442	4.70428e-61	1.37824e-58	128.239
MSN	1.0176	12.6206	18.9944	8.14549e-61	2.35802e-58	127.693
HEPH	1.24072	9.72958	18.9735	1.02495e-60	2.93221e-58	127.465
NFASC	1.17456	10.0557	18.8985	2.34061e-60	6.46778e-58	126.644
NRP2	1.23164	10.0227	18.8744	3.05101e-60	8.33613e-58	126.38
CSF1R	1.05838	10.3555	18.8135	5.95793e-60	1.57477e-57	125.715
DCN	1.50511	12.8885	18.802	6.76402e-60	1.76861e-57	125.589
ISLR	1.20661	11.2021	18.7347	1.41757e-59	3.59074e-57	124.853
PCOLCE	1.12377	11.0454	18.7327	1.44815e-59	3.63039e-57	124.832
CD93	1.10817	11.013	18.6987	2.10529e-59	5.19455e-57	124.46
OLFML2B	1.06138	8.7669	18.6412	3.95753e-59	9.62351e-57	123.833
SLCO2B1	1.04598	9.87272	18.5659	9.04666e-59	2.09512e-56	123.011
DDR2	1.21821	10.716	18.4884	2.11603e-58	4.80892e-56	122.166
EPHA3	1.45453	10.5907	18.2834	1.99673e-57	4.18573e-55	119.935
C1R	1.25661	13.0249	18.2667	2.39714e-57	4.98216e-55	119.754
SSC5D	1.32818	9.43357	18.2292	3.61154e-57	7.37998e-55	119.346
CAMK4	1.1347	8.8566	18.1938	5.32324e-57	1.06103e-54	118.961
SERPING1	1.20232	12.9272	18.1164	1.23906e-56	2.37246e-54	118.121
PRELP	1.32398	12.3779	18.0925	1.60866e-56	3.03238e-54	117.861
CLMP	1.05576	8.79786	18.0849	1.74771e-56	3.26915e-54	117.779
MEF2C	1.10751	9.78339	18.084	1.76465e-56	3.27565e-54	117.769
SPARCL1	1.25172	14.0054	18.0707	2.04246e-56	3.76262e-54	117.624
NID1	1.21337	10.8552	18.0583	2.33859e-56	4.21241e-54	117.49
MRC2	1.04813	11.4567	18.0565	2.38457e-56	4.26365e-54	117.47
COL1A1	1.46803	14.2023	18.0379	2.9195e-56	5.18201e-54	117.269
VCAN	1.64892	10.4004	18.0342	3.03984e-56	5.35651e-54	117.229
TGFBR2	1.04203	11.6403	17.9688	6.20374e-56	1.06237e-53	116.52
CFH	1.22531	9.91347	17.9598	6.84818e-56	1.16453e-53	116.422
ZNF423	1.02869	8.90475	17.9525	7.41069e-56	1.2428e-53	116.343
COL5A2	1.28962	10.4942	17.9074	1.21111e-55	2.00344e-53	115.855
C1QTNF7	1.20184	8.28549	17.8141	3.34569e-55	5.46021e-53	114.845
CPVL	1.00859	9.36872	17.7869	4.49818e-55	7.24386e-53	114.551
VCAM1	1.21321	9.27624	17.7144	9.89856e-55	1.54297e-52	113.767
DACT1	1.06161	9.06831	17.7015	1.13925e-54	1.76454e-52	113.627
MGP	1.30075	14.106	17.6925	1.25625e-54	1.93343e-52	113.53
SFRP2	1.52533	10.682	17.6609	1.77109e-54	2.66853e-52	113.189
TNXB	1.19151	9.65376	17.5216	8.03146e-54	1.16947e-51	111.686
ABCC9	1.22139	9.0756	17.5167	8.46526e-54	1.2253e-51	111.634
PRRX1	1.22958	10.661	17.4305	2.15626e-53	3.03085e-51	110.705
THY1	1.18315	10.1904	17.3855	3.50889e-53	4.84805e-51	110.221
COL4A4	1.08014	8.75789	17.3459	5.38529e-53	7.39854e-51	109.795
MRC1	1.06929	8.28973	17.3412	5.66504e-53	7.73915e-51	109.745
MATN2	1.15184	12.1535	17.3256	6.70774e-53	9.06178e-51	109.577
LTBP1	1.1072	12.2643	17.2711	1.20889e-52	1.6152e-50	108.991
ADGRD1	1.24769	8.30194	17.2515	1.49525e-52	1.98536e-50	108.78
PRKG1	1.11381	8.50741	17.1636	3.86282e-52	5.02312e-50	107.837
ABCB1	1.0223	9.00386	17.0561	1.23065e-51	1.57503e-49	106.685
GSN	1.03178	14.1641	17.0415	1.4408e-51	1.81534e-49	106.528
PAMR1	1.12444	9.83417	17.0211	1.79538e-51	2.25042e-49	106.31
RCAN2	1.10802	9.87899	17.0204	1.80869e-51	2.25548e-49	106.302
AQP1	1.03874	12.1102	16.994	2.40302e-51	2.95123e-49	106.02
LTBP2	1.16259	11.6158	16.9257	5.00728e-51	6.05781e-49	105.29
NXPH3	1.09661	9.2492	16.8602	1.01341e-50	1.20211e-48	104.59
HGF	1.19446	8.56304	16.8519	1.10676e-50	1.30646e-48	104.502
BGN	1.20909	13.535	16.8468	1.16994e-50	1.37436e-48	104.447
COL16A1	1.06672	11.7291	16.8417	1.23562e-50	1.44455e-48	104.393
THBS2	1.47199	10.4184	16.821	1.54285e-50	1.77807e-48	104.172
PIEZO2	1.03062	8.58863	16.8152	1.64211e-50	1.88355e-48	104.11
FILIP1L	1.40936	10.8531	16.7994	1.94607e-50	2.21133e-48	103.941
ITGA11	1.29595	9.50019	16.7754	2.5163e-50	2.81977e-48	103.686
COL8A2	1.08478	9.43105	16.7706	2.65024e-50	2.95623e-48	103.634
NT5E	1.04284	9.1167	16.752	3.23511e-50	3.59215e-48	103.436
IFI16	1.00982	10.3102	16.7177	4.67366e-50	5.11935e-48	103.071
SYNE1	1.11578	11.283	16.6952	5.94586e-50	6.42602e-48	102.832
COL6A1	1.09214	13.0385	16.6888	6.36653e-50	6.79013e-48	102.764
FIBIN	1.22152	9.2486	16.6793	7.05498e-50	7.49152e-48	102.662
FGL2	1.04955	9.74203	16.678	7.1493e-50	7.55868e-48	102.648
ADAM19	1.01241	8.61952	16.576	2.13038e-49	2.15852e-47	101.563
FBLN2	1.33535	11.0551	16.4979	4.91024e-49	4.91173e-47	100.734
TMEM200A	1.03189	7.86259	16.4975	4.9285e-49	4.91173e-47	100.73
ITGA1	1.0862	11.6719	16.4713	6.52338e-49	6.42223e-47	100.451
DIO2	1.17182	10.5276	16.4641	7.04082e-49	6.90369e-47	100.375
HMCN1	1.4765	9.56744	16.3733	1.85371e-48	1.79589e-46	99.4135
ABI3BP	1.17547	9.14569	16.3229	3.17052e-48	3.02343e-46	98.8802
SLIT3	1.16946	9.73774	16.1802	1.44631e-47	1.32717e-45	97.3722
NEGR1	1.1018	8.60385	16.1	3.38721e-47	3.06196e-45	96.5266
LTBP4	1.12288	13.3452	16.0161	8.23853e-47	7.20634e-45	95.6435
EMILIN1	1.17472	12.0841	15.9236	2.19153e-46	1.84399e-44	94.6714
CD4	1.01156	9.92008	15.8184	6.65526e-46	5.43074e-44	93.5678
PCDH10	1.32685	9.77223	15.801	7.99305e-46	6.50057e-44	93.3858
FAT4	1.24717	8.91162	15.715	1.97699e-45	1.55581e-43	92.4861
IGFBP4	1.07128	13.3851	15.7117	2.04739e-45	1.60601e-43	92.4514
EHD2	1.0441	11.6019	15.6967	2.3972e-45	1.86239e-43	92.2947
PCDH18	1.13198	9.50725	15.678	2.91731e-45	2.23787e-43	92.0996
IL33	1.06559	9.78306	15.6456	4.10326e-45	3.10838e-43	91.7607
EDNRA	1.13833	10.4385	15.6414	4.2868e-45	3.23733e-43	91.7172
BMP4	1.02385	9.06565	15.6385	4.41904e-45	3.32686e-43	91.687
FGF2	1.04689	8.84394	15.4636	2.76562e-44	1.96069e-42	89.8652
NES	1.02935	11.4596	15.4613	2.83323e-44	2.00278e-42	89.8412
MRVI1	1.25668	11.1237	15.4354	3.7138e-44	2.59507e-42	89.5723
MXRA5	1.13006	10.8542	15.422	4.27454e-44	2.96983e-42	89.4326
TMEM200B	1.09303	8.84602	15.4183	4.44205e-44	3.06868e-42	89.3944
MIR6756	1.06747	11.6956	15.4111	4.78701e-44	3.27903e-42	89.3201
SPON1	1.27512	9.76765	15.4043	5.14343e-44	3.50344e-42	89.2488
C1QTNF1	1.08612	10.3544	15.313	1.33348e-43	8.81149e-42	88.3025
EFEMP1	1.15056	10.905	15.3116	1.35387e-43	8.92196e-42	88.2874
CSF2RB	1.0068	8.11607	15.2852	1.78318e-43	1.1594e-41	88.0138
GFRA1	1.20492	8.67942	15.254	2.46848e-43	1.5838e-41	87.6908
ANK2	1.07965	8.77854	15.2533	2.48431e-43	1.58976e-41	87.6844
CALCRL	1.07892	9.55459	15.2159	3.668e-43	2.31074e-41	87.2974
MSRB3	1.19022	11.2424	15.2008	4.29104e-43	2.68931e-41	87.1415
SERPINF1	1.19696	11.8043	15.1584	6.6702e-43	4.13774e-41	86.7034
TCF21	1.08107	9.12142	15.1446	7.70252e-43	4.75386e-41	86.5604
ITGA9	1.0472	10.0984	15.1198	9.95928e-43	6.0394e-41	86.3052
NID2	1.03283	8.42594	15.1183	1.01213e-42	6.12237e-41	86.2892
INHBA	1.37276	8.87148	15.1152	1.04501e-42	6.3056e-41	86.2574
POSTN	1.28146	10.8992	15.0769	1.55482e-42	9.26678e-41	85.8628
NEXN	1.25081	10.4976	15.0648	1.76237e-42	1.04526e-40	85.7383
VSTM4	1.05489	10.0137	15.0639	1.77979e-42	1.05302e-40	85.7285
CCDC3	1.10565	9.82706	15.0273	2.60083e-42	1.5322e-40	85.3518
ITGA8	1.53732	10.5816	15.02	2.8062e-42	1.6443e-40	85.2763
CNTN1	1.30868	10.059	15.0184	2.85073e-42	1.66637e-40	85.2606
FBLN1	1.28146	13.4214	15.0028	3.35235e-42	1.93173e-40	85.0996
FN1	1.24857	13.825	14.9839	4.07603e-42	2.34162e-40	84.9055
KDR	1.04241	10.2176	14.9837	4.08293e-42	2.34162e-40	84.9038
PCOLCE2	1.2242	8.77324	14.966	4.90486e-42	2.7998e-40	84.7217
FLRT2	1.16406	9.06328	14.8849	1.13421e-41	6.34039e-40	83.8891
RGS5	1.06634	12.5309	14.8744	1.26458e-41	7.0368e-40	83.781
SLC8A1	1.23087	10.0364	14.8551	1.54338e-41	8.54905e-40	83.5831
DKK3	1.10579	11.5902	14.8456	1.70238e-41	9.40836e-40	83.4857
MPEG1	1.06213	9.6921	14.7437	4.86007e-41	2.64983e-39	82.4439
CD163	1.07837	9.16155	14.739	5.1004e-41	2.77464e-39	82.396
ADGRA2	1.20898	11.6947	14.6482	1.29619e-40	6.92737e-39	81.4697
PGR	1.10966	8.71022	14.6415	1.3892e-40	7.39196e-39	81.4009
ADAMTS5	1.07621	8.12549	14.5472	3.65239e-40	1.89371e-38	80.4409
SVEP1	1.04215	8.71096	14.5448	3.74031e-40	1.93517e-38	80.4173
CLIP3	1.02314	10.1697	14.5356	4.11171e-40	2.11384e-38	80.3233
PLN	1.19073	9.546	14.507	5.50683e-40	2.80145e-38	80.0332
CYBB	1.07733	9.54281	14.4958	6.17637e-40	3.11599e-38	79.9192
CCND2	1.09399	10.928	14.4517	9.68861e-40	4.78858e-38	79.4722
ANTXR1	1.06494	12.0817	14.4422	1.06781e-39	5.25625e-38	79.3756
LMO3	1.09928	8.3828	14.4399	1.09359e-39	5.3723e-38	79.3519
CPXM2	1.17963	10.19	14.4183	1.36215e-39	6.63794e-38	79.1338
FOXF1	1.1059	9.74083	14.4132	1.43514e-39	6.96575e-38	79.082
FXYD6	1.11969	9.87257	14.4015	1.61783e-39	7.83678e-38	78.963
CH25H	1.05772	7.51185	14.3951	1.72576e-39	8.32647e-38	78.8989
PDE5A	1.25655	11.3819	14.3453	2.86753e-39	1.37263e-37	78.3947
CTSS	1.0032	10.5874	14.3289	3.38882e-39	1.60949e-37	78.2288
DAAM2	1.13508	9.53669	14.2734	5.95655e-39	2.78549e-37	77.6688
SCN7A	1.21762	8.9256	14.2401	8.3508e-39	3.86793e-37	77.3333
CXCR4	1.08837	10.6613	14.2207	1.01623e-38	4.68024e-37	77.1384
GEM	1.17775	9.59251	14.152	2.03823e-38	9.17844e-37	76.4474
F2R	1.034	10.5376	14.15	2.08121e-38	9.35465e-37	76.4267
F13A1	1.12431	8.81091	14.0885	3.87683e-38	1.72345e-36	75.8091
PALLD	1.01273	13.1105	14.0507	5.67721e-38	2.50095e-36	75.4304
CSDC2	1.00177	8.61623	14.0212	7.64105e-38	3.35392e-36	75.1354
TSPAN18	1.00708	9.67602	13.9901	1.04542e-37	4.53955e-36	74.8242
HTRA3	1.09486	10.0827	13.959	1.43085e-37	6.16916e-36	74.5126
STRA6	1.07774	8.70969	13.9558	1.47675e-37	6.33337e-36	74.4813
AOC3	1.07001	11.5132	13.8099	6.39304e-37	2.66198e-35	73.0266
TNS1	1.19778	13.8254	13.7279	1.45132e-36	5.83334e-35	72.2128
MASP1	1.45405	10.3742	13.665	2.72e-36	1.07374e-34	71.5893
DACT3	1.00787	9.4087	13.5856	5.99877e-36	2.3228e-34	70.8042
PTGIS	1.18612	10.3905	13.5726	6.82548e-36	2.63871e-34	70.6761
HSPB7	1.23113	9.60061	13.5652	7.34421e-36	2.83475e-34	70.6034
CTGF	1.27988	13.2793	13.4458	2.40064e-35	9.05059e-34	69.4279
TMEM130	1.11722	8.27067	13.4344	2.68675e-35	1.00979e-33	69.3161
ADCY5	1.05553	10.2329	13.4223	3.02775e-35	1.13445e-33	69.1975
MAP1B	1.10838	11.8754	13.4098	3.42888e-35	1.27884e-33	69.0741
ESR1	1.0173	9.2511	13.4024	3.68955e-35	1.37185e-33	69.0014
SFRP1	1.14412	11.6925	13.3955	3.94806e-35	1.46573e-33	68.9341
C7	1.48174	11.3208	13.3884	4.23566e-35	1.56295e-33	68.8644
CPED1	1.14885	10.0966	13.2838	1.18835e-34	4.28105e-33	67.8406
NTRK2	1.04011	8.75613	13.282	1.20986e-34	4.3521e-33	67.8228
HLA-DQA1	1.03682	10.998	13.2736	1.31347e-34	4.71784e-33	67.7413
IGFBP5	1.02029	14.3686	13.2004	2.69793e-34	9.48057e-33	67.027
PRKCB	1.09639	8.78804	13.1853	3.12792e-34	1.09599e-32	66.8802
AKAP12	1.0513	11.1981	13.1792	3.32203e-34	1.16066e-32	66.8205
OLFML3	1.01049	10.5995	13.142	4.78422e-34	1.65018e-32	66.4586
FGF7	1.11806	8.57222	13.0666	1.0003e-33	3.39726e-32	65.7267
KCNMA1	1.05386	11.3781	13.0636	1.02996e-33	3.48825e-32	65.6977
C3	1.41065	12.3311	13.0599	1.06779e-33	3.60631e-32	65.662
FAIM2	1.01134	9.19925	12.9676	2.62538e-33	8.60397e-32	64.7694
TIMP3	1.01352	8.22543	12.8758	6.40504e-33	2.04667e-31	63.8846
ATP2B4	1.06922	11.8435	12.866	7.04512e-33	2.2365e-31	63.7901
PTPRC	1.16228	9.64279	12.8651	7.10727e-33	2.25329e-31	63.7814
ITGA4	1.01359	8.01988	12.849	8.30974e-33	2.62085e-31	63.6263
MMRN1	1.0494	8.13927	12.8192	1.10816e-32	3.4681e-31	63.3407
MRGPRF	1.07577	10.2414	12.7142	3.05682e-32	9.35003e-31	62.3342
IGF2	1.2263	9.70005	12.7126	3.1055e-32	9.48699e-31	62.3185
NDNF	1.16461	8.64907	12.7066	3.29022e-32	1.00387e-30	62.2612
HMCN2	1.00931	9.02671	12.6584	5.22881e-32	1.56974e-30	61.8017
FHL1	1.29516	12.4348	12.619	7.63888e-32	2.2653e-30	61.4257
OGN	1.22855	10.1057	12.6147	7.95891e-32	2.35446e-30	61.385
RASL12	1.08631	10.3646	12.5983	9.31488e-32	2.74225e-30	61.229
LMOD1	1.24989	12.6583	12.4835	2.79622e-31	8.02782e-30	60.1387
SORBS1	1.20924	12.285	12.2947	1.68587e-30	4.65856e-29	58.3571
PTGS1	1.06284	9.16379	12.2929	1.71528e-30	4.73445e-29	58.3399
WSCD2	1.01881	8.0519	12.2802	1.93367e-30	5.32514e-29	58.2211
FLNA	1.17009	15.9545	12.2058	3.90824e-30	1.06068e-28	57.5234
MYOC	1.09897	7.291	11.9911	2.93928e-29	7.58752e-28	55.523
S100A4	1.00623	10.2955	11.9869	3.05873e-29	7.8875e-28	55.4836
SYNPO2	1.30881	13.6194	11.8766	8.55129e-29	2.15707e-27	54.4645
ACTA2	1.12607	15.047	11.8434	1.16536e-28	2.91545e-27	54.1576
AHNAK2	1.08757	9.97284	11.8213	1.4307e-28	3.56825e-27	53.9543
HHIP	1.18359	9.126	11.7601	2.52272e-28	6.20902e-27	53.3922
WFDC1	1.06705	10.4398	11.7422	2.97699e-28	7.26821e-27	53.2281
CPA3	1.0095	8.96468	11.7236	3.53575e-28	8.59788e-27	53.0576
ASPN	1.05726	9.19462	11.7182	3.71546e-28	9.01684e-27	53.0085
EDNRB	1.06062	9.44738	11.6623	6.21978e-28	1.49305e-26	52.4979
NCAM1	1.20922	8.74897	11.6548	6.66861e-28	1.59764e-26	52.4288
IL7R	1.15118	9.12335	11.5596	1.59831e-27	3.74071e-26	51.5627
FENDRR	1.03483	9.08911	11.5368	1.96988e-27	4.58826e-26	51.3555
ITGBL1	1.14121	8.10811	11.4687	3.67163e-27	8.40707e-26	50.7386
CHRDL1	1.30718	11.1508	11.447	4.47569e-27	1.01906e-25	50.5424
C2orf40	1.05849	8.90651	11.4086	6.34974e-27	1.43902e-25	50.1959
FAM83D	1.03433	8.91776	11.3088	1.57129e-26	3.48306e-25	49.2983
STC1	1.02751	9.44799	11.1702	5.48471e-26	1.18237e-24	48.0601
ANGPT1	1.00124	8.96066	11.0474	1.64847e-25	3.44085e-24	46.9702
THBS1	1.16342	12.7829	11.0332	1.87066e-25	3.88793e-24	46.845
IGFBP6	1.1004	10.3574	10.9772	3.08264e-25	6.31512e-24	46.3504
MYLK	1.18715	14.3028	10.9704	3.27453e-25	6.69694e-24	46.2906
RARRES1	1.25874	9.80816	10.9119	5.50266e-25	1.11786e-23	45.7767
SPOCK3	1.09152	10.3107	10.8353	1.08441e-24	2.14561e-23	45.1051
KCNMB1	1.0404	10.4917	10.8124	1.32646e-24	2.60968e-23	44.9056
CHRDL2	1.05185	8.32418	10.6892	3.91652e-24	7.41729e-23	43.8339
CCL21	1.11598	8.66177	10.6349	6.29718e-24	1.17973e-22	43.3639
CES1	1.05629	10.0447	10.6346	6.31639e-24	1.18242e-22	43.3608
TAGLN	1.04424	15.3448	10.602	8.38946e-24	1.55968e-22	43.0799
ACKR1	1.03267	10.3208	10.4195	4.08116e-23	7.29718e-22	41.5145
CDH2	1.05702	7.71728	10.3897	5.27485e-23	9.3695e-22	41.2607
WNT2	1.03973	7.62835	10.3822	5.62876e-23	9.96901e-22	41.1964
SFRP4	1.27418	11.2825	10.3444	7.78364e-23	1.37056e-21	40.8758
PI16	1.42792	8.14527	10.3171	9.84146e-23	1.71552e-21	40.6437
FLNC	1.24376	12.9565	10.2477	1.78066e-22	3.05146e-21	40.0572
MYH11	1.22063	16.5324	10.0398	1.03746e-21	1.70229e-20	38.3143
JPH2	1.01957	10.1765	10.0254	1.17148e-21	1.91316e-20	38.1941
SERPINE1	1.2521	10.2715	9.9177	2.88889e-21	4.60349e-20	37.3018
LYZ	1.11015	10.6039	9.87873	3.99865e-21	6.28541e-20	36.9804
HSPB6	1.10706	10.9924	9.80815	7.19064e-21	1.11231e-19	36.4004
CCL19	1.08594	8.66152	9.71514	1.55142e-20	2.34467e-19	35.6405
HSPB8	1.07587	11.4139	9.30899	4.20934e-19	5.85576e-18	32.3801
COL10A1	1.18558	8.14763	8.99704	4.97605e-18	6.41243e-17	29.9423
LDB3	1.00986	9.55421	8.96019	6.63631e-18	8.48449e-17	29.6583
ADAMTS4	1.14126	8.87268	8.84113	1.67286e-17	2.08396e-16	28.7463
PGM5	1.08248	11.9937	8.82029	1.9649e-17	2.43281e-16	28.5876
COMP	1.41961	10.5279	8.80179	2.26618e-17	2.79304e-16	28.4469
JCHAIN	1.38825	10.0251	8.76672	2.96812e-17	3.61784e-16	28.1809
ATP1A2	1.06594	9.97417	8.74768	3.43532e-17	4.17683e-16	28.0367
CNN1	1.03084	13.8166	8.67578	5.95432e-17	7.11855e-16	27.4945
SOCS3	1.17382	11.3306	8.55582	1.47972e-16	1.72247e-15	26.5972
IGLL5	1.11327	7.84331	8.53868	1.68412e-16	1.95292e-15	26.4697
DES	1.13092	15.4424	8.53802	1.69245e-16	1.96071e-15	26.4649
PTGDS	1.04025	12.4279	7.99241	9.40746e-15	9.47644e-14	22.5089
CP	1.14938	9.61464	7.87249	2.2161e-14	2.16161e-13	21.6662
GREM1	1.04488	9.75005	7.78548	4.10162e-14	3.90368e-13	21.061
ACTG2	1.0028	14.9511	7.57478	1.7828e-13	1.58568e-12	19.6173
SELE	1.14453	9.1471	7.51974	2.60384e-13	2.27925e-12	19.2453
BMP5	1.07404	6.76121	7.13756	3.4074e-12	2.65655e-11	16.7225
CXCL14	1.00359	10.3131	6.99875	8.4495e-12	6.29493e-11	15.8326
ACTC1	1.01816	8.82508	6.27134	7.81529e-10	4.62395e-09	11.4075
NPY	-1.58064	13.4226	-5.30822	1.67502e-07	7.11467e-07	6.19383
LTF	1.14933	12.6234	4.1043	4.74346e-05	0.000140701	0.780717
TGM4	1.0522	9.72774	3.54578	0.000428678	0.00109142	-1.29161
